# Supplementary material for: Prevalence of Ranavirus Infection in Three Anuran Species across South Korea
Source: MDPI journal article supplement (doi:10.3390/v14051073), 2022-05-17

**Supplementary Materials Figure S1:** The representative qPCR results of *D. japonicus* (A,B) collected at Haenam, *P. nigromaculatus* (C,D) collected at Pohang, and *L. catesbeianus* (E,F) collected at Gimcheon, and the photographs of representative gel electrophoresis of the MCP fragment (~520 bp), which confirmed the qPCR result again by sequencing the fragment (G,H) in the further study.

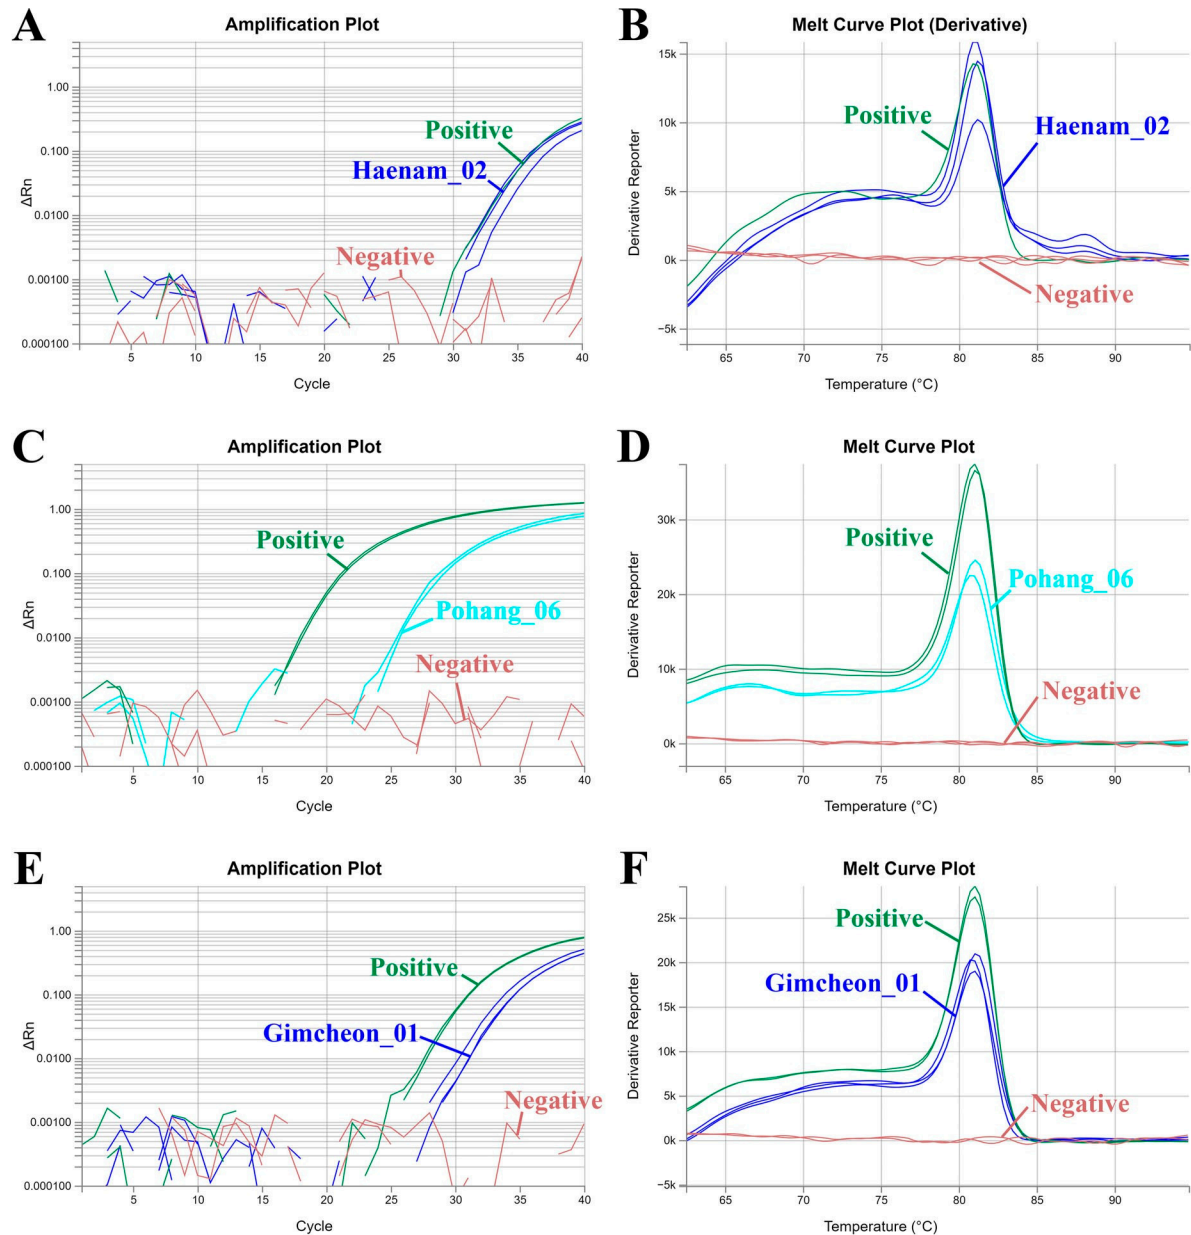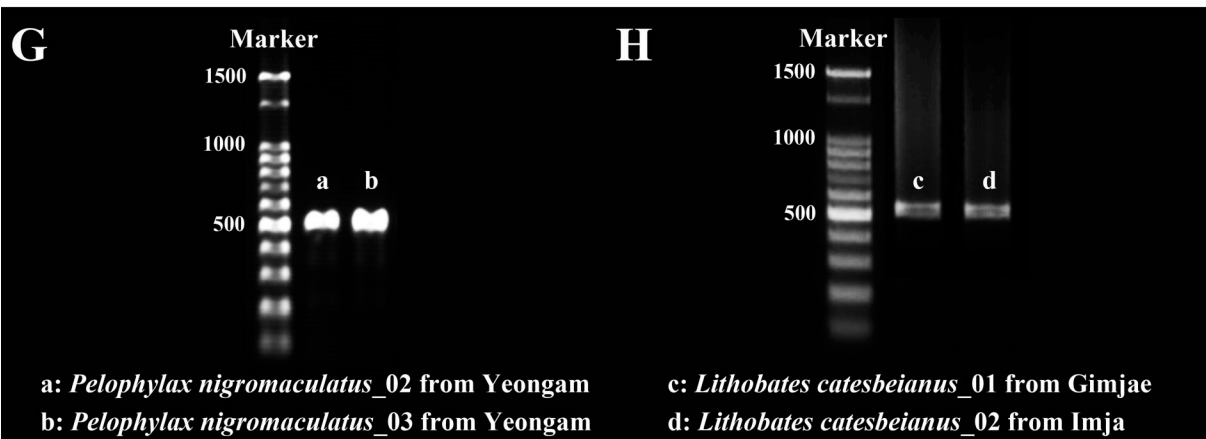

Supplement: s1 [file s1]
